# Supplementary material for: The effects of locomotion on sensory-evoked haemodynamic responses in the cortex of awake mice
Source: PubMed Central journal article supplement (PMC9010417; doi:10.1038/s41598-022-10195-y), 2022-04-14
Supplement: 41598_2022_10195_MOESM1_ESM.pdf [file 41598_2022_10195_MOESM1_ESM.pdf]

## Supplementary figures and tables

### The effects of locomotion on sensory-evoked haemodynamic responses in the cortex of awake mice

Beth Eyre<sup>1,2,3^\*</sup>, Kira Shaw<sup>1,5^</sup>, Paul Sharp<sup>1,6</sup>, Luke Boorman<sup>1</sup>, Llywelyn Lee<sup>1,2,3</sup>, Osman Shabir<sup>1,2,3,4</sup>, Jason Berwick<sup>1,2,3+</sup>, Clare Howarth<sup>1,2,3+</sup>

<sup>1</sup>Sheffield Neurovascular Lab, Department of Psychology, University of Sheffield, Alfred Denny Building, Western Bank, Sheffield, S10 2TN (United Kingdom)

<sup>2</sup>Neuroscience Institute, University of Sheffield, Sheffield, S10 2TN (United Kingdom)

<sup>3</sup>Healthy lifespan Institute, University of Sheffield

<sup>4</sup>Department of Infection, Immunity & Cardiovascular Disease (IICD), University of Sheffield Medical School, Royal Hallamshire Hospital, Beech Hill Road, Sheffield, S10 2RX (United Kingdom)

<sup>5</sup>School of Psychology and Sussex Neuroscience, University of Sussex, Falmer, Brighton, United Kingdom

<sup>6</sup>Medicines Discovery Catapult, Mereside, Alderley Park, Alderley Edge, SK10 4TG

<sup>^</sup>These authors contributed equally. <sup>+</sup>These authors contributed equally. \* Corresponding author.

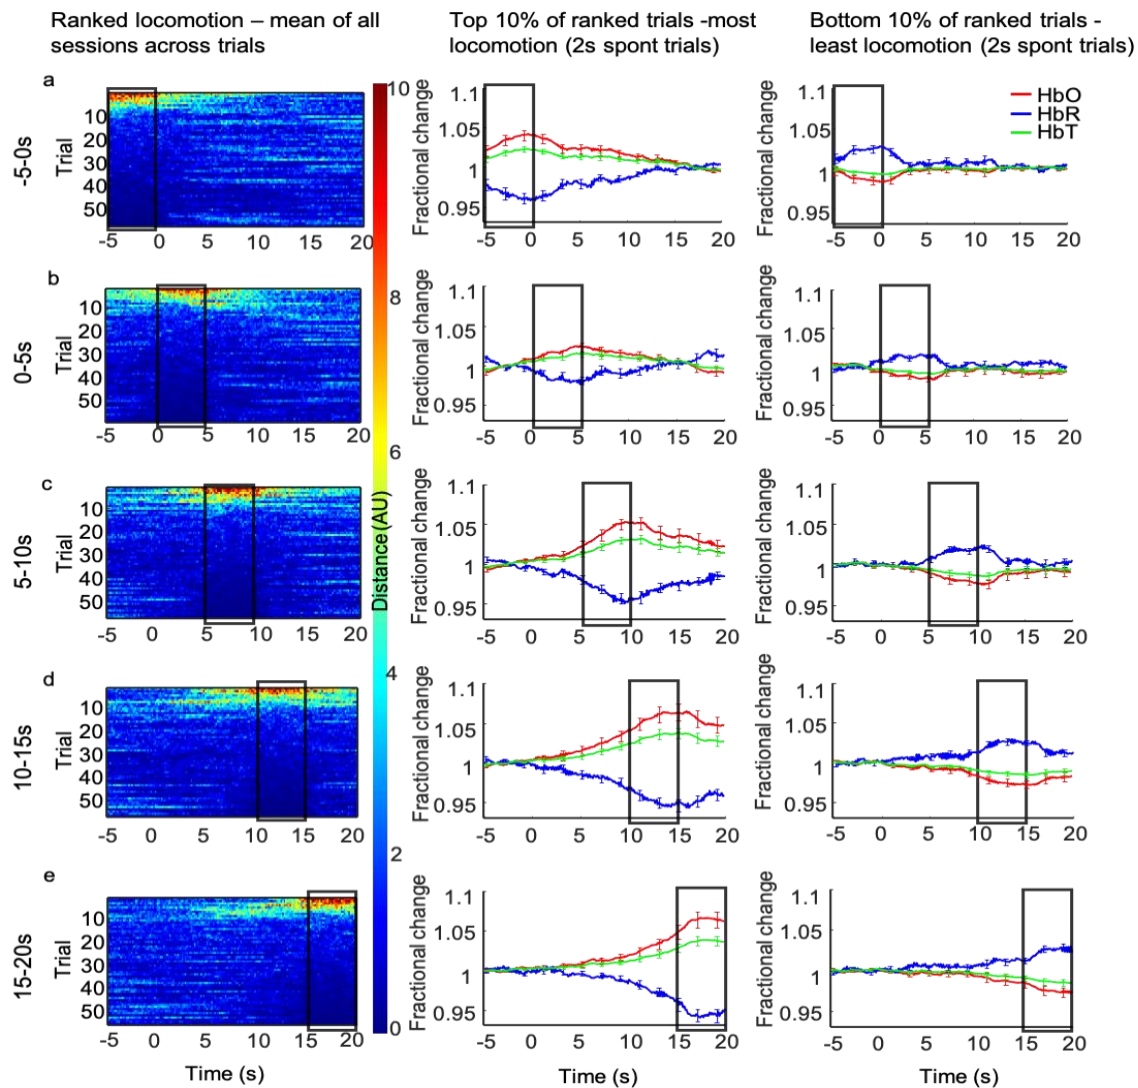

**Supplementary figure 1: Mean locomotion induced haemodynamic responses for the whisker ROI (Fig. 5 column 1) during trials where the most and least locomotion occurred with locomotion ranked at different time windows throughout a 25s time period. Column one:** heat maps show locomotion traces for the 59 whisker-stimulation trials, with spontaneous locomotion ranked at different 5s time windows during a 25s time period (each ranked trial was averaged across 21 sessions/4 animals). The different 5s windows during the 25s time period where locomotion was ranked are: before (a: -5-0s), during (b: 0-5s) and after whisker stimulation (c: 5-10s, d: 10-15s, e: 15-20s). Trials were ranked according to locomotion in these 5s periods and presented in descending order. Colour bar indicates amount of locomotion, red pixels indicate more locomotion and dark blue indicate less locomotion. **Column two:** mean fractional changes from baseline in HbT, HbO and HbR taken from the top 10% of ranked locomotion trials across the different 5s time windows (21 sessions/4 animals; n=6 top per session (mean of top trials taken for each session, mean of all sessions used in the visualisation/analysis)). **Column three:** mean fractional changes in HbT, HbO and HbR for the bottom 10% of locomotion trials ranked across the 5s time windows throughout the trial (21 sessions/4 animals; n=6 bottom per session (mean of bottom trials taken for each session, mean of all sessions used in the visualisation/analysis)). Black boxes indicate the 5s time window locomotion was ranked. Data show mean across the total 126 trials +/- SEM.

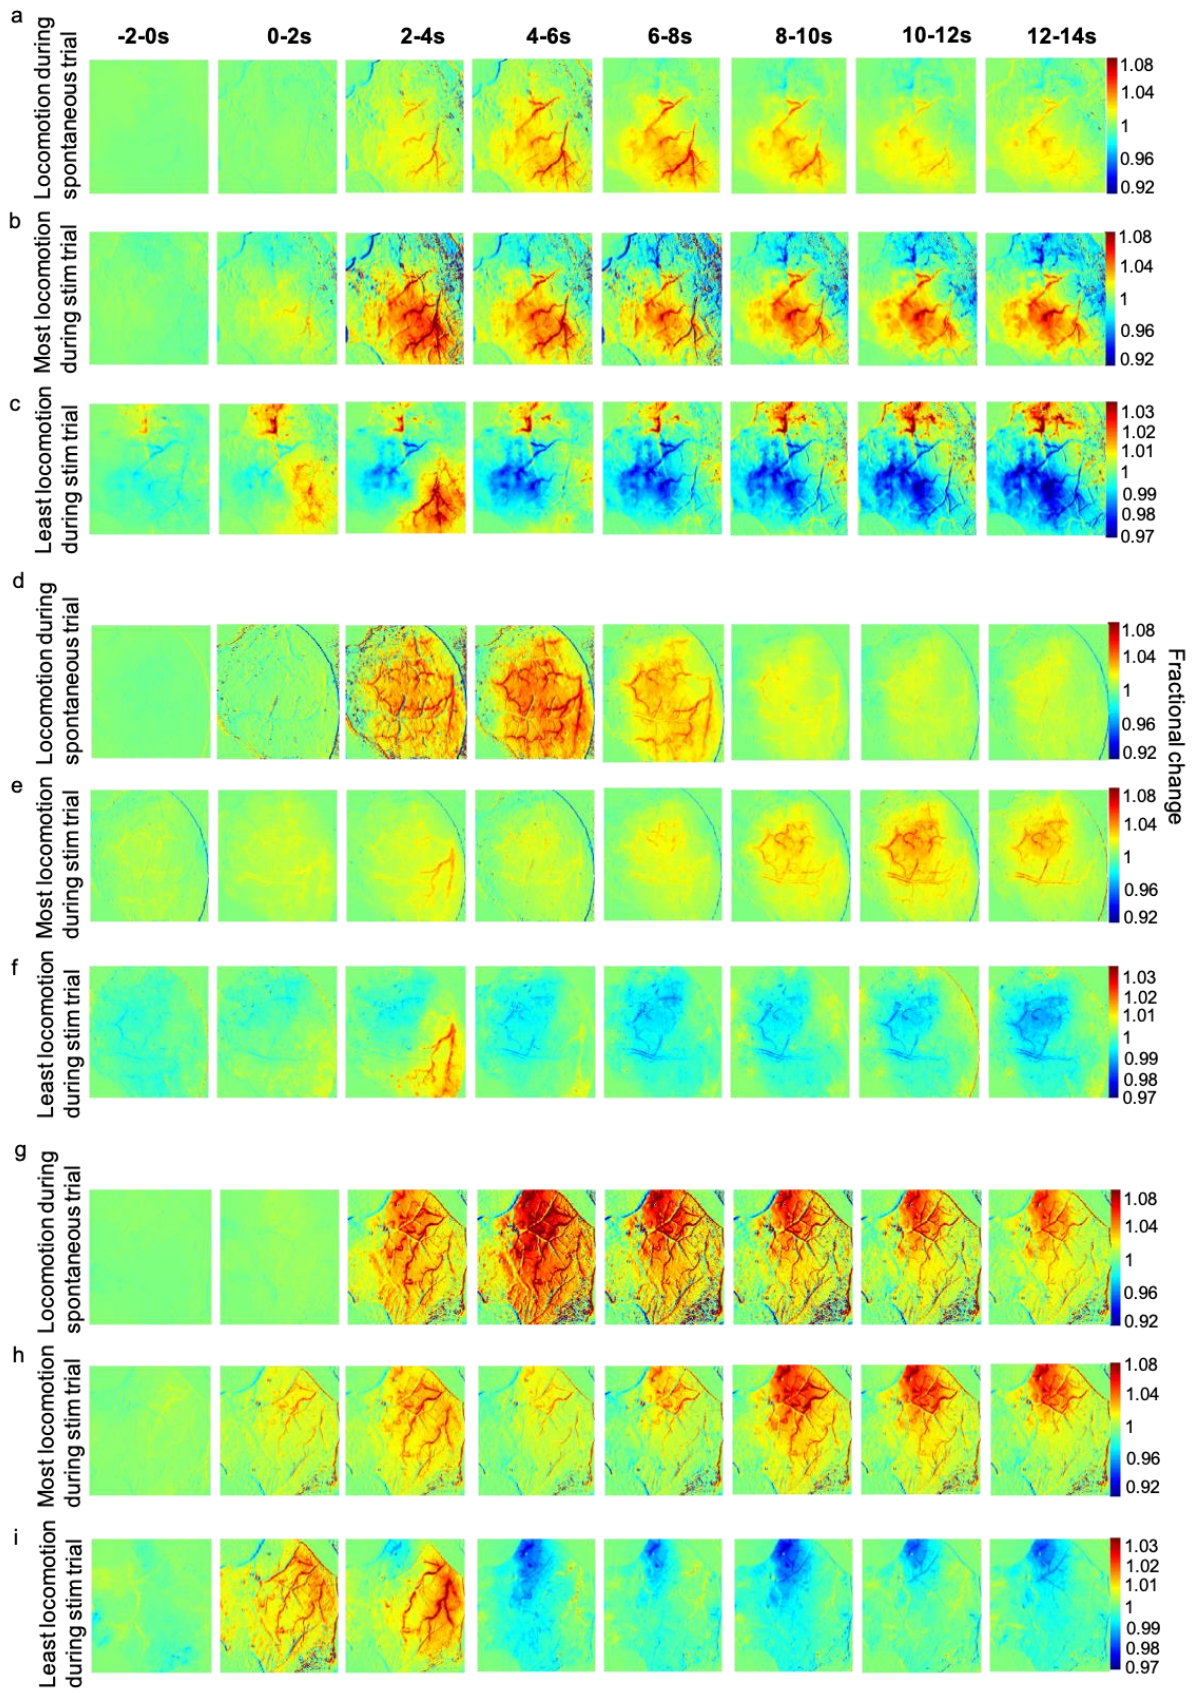

**Supplementary figure 2: HbT spatial montages for each animal during spontaneous locomotion and most and least locomotion during a 2s whisker stimulation.** HbT spatial maps reveal fractional change in HbT across the vasculature over time, starting 2s prior to whisker stimulation (or locomotion) to 14s post stimulation. Each spatial image is an average of 2s of data. Whisker stim/spontaneous locomotion occur at 0s. Red pixels indicate an increase in activation and blue pixels indicate a decrease in activation. **(a-c)** show spatial HbT maps for animal 1 for spontaneous locomotion **(a)**, most locomotion during a 2s whisker stim **(b)** and least locomotion during a 2s whisker stim **(c)**. **(d-f)** show the HbT spatial responses for animal 3 for spontaneous locomotion **(d)**, most locomotion during a 2s whisker stim **(e)** and least locomotion during a 2s whisker stim **(f)**. **(g-i)** show the HbT spatial responses for animal 4 for spontaneous locomotion **(g)**, most locomotion during a 2s whisker stim **(h)** and least locomotion during a 2s whisker stim **(i)**.

### Supplementary tables for statistics outputs

All data values were included in the statistical analysis even if outliers were found as there was no scientific reason to remove them from the data set. Data used in the analysis can be found in the DRYAD repository, doi:10.5061/dryad.v41ns1rxs

#### Distance travelled

#### **Supplementary table S1: Shapiro Wilk test of normality for distanced travelled during spontaneous and whisker stimulation trials**

| Distance travelled          | Statistic | df | p    |
|-----------------------------|-----------|----|------|
| Spontaneous vs Whisker stim | .691      | 21 | .000 |

*Normality was assessed using a difference variable comparing distanced travelled during spontaneous trials with distance travelled during whisker stimulation trials*

#### **Supplementary table S2: Sign test result for distance travelled during spontaneous and whisker stimulation trials**

| Type of trial   | N  | Mean  | Median | SEM  | z     | p    |
|-----------------|----|-------|--------|------|-------|------|
| Spontaneous     | 21 | 13610 | 12360  | 1532 | -     | -    |
| 2s whisker stim | 21 | 17802 | 14894  | 2732 | -     | -    |
| Difference      | 21 | -4192 | -1517  | 2065 | 1.309 | .189 |

Greatest vs Least locomotion

**Supplementary table S3: Shapiro Wilk test of normality for greatest vs least locomotion (where locomotion ranked across the entire 25s trial)**

| <b>Greatest Locomotion vs Least Locomotion</b> |                  |           |          |
|------------------------------------------------|------------------|-----------|----------|
| <b>Haemodynamic Measure</b>                    | <b>Statistic</b> | <b>df</b> | <b>p</b> |
| HbT                                            | .568             | 21        | .000     |
| HbO                                            | .695             | 21        | .000     |
| HbR                                            | .923             | 21        | .100     |

**Supplementary table S4: Wilcoxon signed ranks result for HbR greatest vs least locomotion (where locomotion is ranked across the entire 25s trial)**

|                              | <b>N</b> | <b>Mean</b> | <b>Median</b> | <b>SEM</b> | <b>z</b> | <b>p</b> |
|------------------------------|----------|-------------|---------------|------------|----------|----------|
| HbR peak greatest locomotion | 21       | 0.947       | 0.948         | .006       | -        | -        |
| HbR peak least locomotion    | 21       | 0.947       | 0.945         | .005       | -        | -        |
| Difference most vs least HbR | 21       | 0.000       | -.0004        | .005       | -.330    | .741     |

**Supplementary table S5: Sign test result for HbT and HbO greatest vs least locomotion (where locomotion is ranked across the entire 25s trial)**

|                              | <b>N</b> | <b>Mean</b> | <b>Median</b> | <b>SEM</b> | <b>z</b> | <b>p</b> |
|------------------------------|----------|-------------|---------------|------------|----------|----------|
| HbT peak greatest locomotion | 21       | 1.043       | 1.038         | .007       | -        | -        |
| HbT peak least locomotion    | 21       | 1.030       | 1.028         | .003       | -        | -        |
| Difference most vs least HbT | 21       | .013        | .003          | .007       | -.873    | .383     |
| HbO peak greatest locomotion | 21       | 1.065       | 1.057         | .009       | -        | -        |
| HbO peak least locomotion    | 21       | 1.053       | 1.049         | .005       | -        | -        |
| Difference most vs least HbO | 21       | .012        | -.0004        | .008       | .000     | 1.000    |

Return to baseline

**Supplementary table S6: Shapiro Wilk test of normality for baseline statistics (mean values taken from last 5s of the 2s whisker stimulation trial (between 15-20s))**

| <b>Haemodynamic Measure</b> | <b>Statistic</b> | <b>df</b> | <b>p</b> |
|-----------------------------|------------------|-----------|----------|
| HbT                         | .877             | 21        | .013     |
| HbO                         | .932             | 21        | .152     |
| HbR                         | .885             | 21        | .018     |

**Supplementary table S7: Sign test result for HbT and HbR return to baseline (HbT/HbR mean values between 15-20s for trials with the most locomotion compared with the mean values between 15-20s for trials with the least locomotion)**

|                              | <b>N</b> | <b>Mean</b> | <b>Median</b> | <b>SEM</b> | <b>z</b> | <b>p</b> |
|------------------------------|----------|-------------|---------------|------------|----------|----------|
| HbT most locomotion          | 21       | 1.018       | 1.019         | .005       | -        | -        |
| HbT least locomotion         | 21       | 0.995       | 0.997         | .002       | -        | -        |
| Difference HbT most vs least | 21       | .024        | .024          | .005       | -3.055   | .001     |
| HbR most locomotion          | 21       | 0.982       | 0.980         | .004       | -        | -        |
| HbR least locomotion         | 21       | 1.000       | 0.999         | .003       | -        | -        |
| Difference HbR most vs least | 21       | -.022       | -.021         | .005       | 3.491    | .000     |

**Supplementary table S8: Wilcoxon Signed Ranks test for HbO return to baseline (HbO mean value between 15-20s for trials with the most locomotion compared with the mean value between 15-20s for trials with the least locomotion)**

|                              | <b>N</b> | <b>Mean</b> | <b>Median</b> | <b>SEM</b> | <b>z</b> | <b>p</b> |
|------------------------------|----------|-------------|---------------|------------|----------|----------|
| HbO most locomotion          | 21       | 1.028       | 1.030         | .006       | -        | -        |
| HbO least locomotion         | 21       | 0.992       | 0.994         | .003       | -        | -        |
| Difference HbO most vs least | 21       | .036        | .032          | .007       | -3.702   | .000     |

Two-way Repeated measures ANOVAs for 2s whisker simulation trials

**Supplementary table S9: Shapiro Wilk test of normality for each time window, amount of locomotion and haemodynamic measures**

| <b>Time window</b> | <b>Most Locomotion</b> |       |            |       |            |      | <b>Least Locomotion</b> |      |            |      |            |       |
|--------------------|------------------------|-------|------------|-------|------------|------|-------------------------|------|------------|------|------------|-------|
|                    | <b>HbT</b>             |       | <b>HbO</b> |       | <b>HbR</b> |      | <b>HbT</b>              |      | <b>HbO</b> |      | <b>HbR</b> |       |
|                    | df                     | p     | df         | p     | df         | p    | df                      | p    | df         | p    | df         | p     |
| -5-0               | 21                     | .000* | 21         | .001* | 21         | .518 | 21                      | .380 | 21         | .174 | 21         | .867  |
| 0-5                | 21                     | .000* | 21         | .001* | 21         | .654 | 21                      | .872 | 21         | .680 | 21         | .186  |
| 5-10               | 21                     | .000* | 21         | .000* | 21         | .429 | 21                      | .172 | 21         | .234 | 21         | .649  |
| 10-15              | 21                     | .000* | 21         | .001* | 21         | .316 | 21                      | .123 | 21         | .496 | 21         | .991  |
| 15-20              | 21                     | .000* | 21         | .005* | 21         | .843 | 21                      | .926 | 21         | .739 | 21         | .046* |

*Performed on studentised residuals. Time window is the time window in which locomotion was calculated for ranking purposes. \*Indicates normality is violated*

**Supplementary table S10: Sphericity Results for the two-way repeated measures ANOVAs (Mauchly's test)**

| Factor               | HbT            |    |      |      | HbO            |    |      |      | HbR            |    |      |      |
|----------------------|----------------|----|------|------|----------------|----|------|------|----------------|----|------|------|
|                      | X <sup>2</sup> | df | p    | ε    | X <sup>2</sup> | df | p    | ε    | X <sup>2</sup> | df | p    | ε    |
| Time                 | 20.297         | 9  | .017 | .731 | 15.859         | 9  | .071 | .753 | 5.798          | 9  | .761 | .883 |
| Time *<br>Locomotion | 24.286         | 9  | .004 | .645 | 17.771         | 9  | .039 | .723 | 20.637         | 9  | .015 | .632 |

*ε indicates Greenhouse Geiser value. X<sup>2</sup> Chi-squared value. Values <.05 sphericity violated*

**Supplementary table S11: Two-Way Repeated ANOVA outputs for HbT, HbO and HbR investigating the interaction between the amount of locomotion (factors: most & least) and the time at which locomotion occurred (factors: -5-0s, 0-5s, 5-10s, 10-15s, 15-20s)**

| Factor               | HbT              |        |      | HbO              |        |      | HbR              |       |      |
|----------------------|------------------|--------|------|------------------|--------|------|------------------|-------|------|
|                      | df               | F      | p    | df               | F      | p    | df               | F     | p    |
| Time                 | 2.925,<br>58.492 | 7.849  | .000 | 4, 80            | 8.435  | .000 | 4, 80            | 9.134 | .000 |
| Locomotion           | 1, 20            | 6.032  | .023 | 1, 20            | 4.868  | .039 | 1, 20            | 3.723 | .068 |
| Time *<br>Locomotion | 2.578,<br>51.566 | 13.351 | .000 | 2.894,<br>57.876 | 13.317 | .000 | 2.526,<br>50.521 | 8.712 | .000 |

**Supplementary table S12: Sphericity Results (Mauchly's test) for simple main effects (One-way ANOVAs) investigating the effects of timing of locomotion on sensory-evoked hemodynamic responses for the most and least locomotion**

|                      | HbT            |    |      |      | HbO            |    |      |      | HbR            |    |      |      |
|----------------------|----------------|----|------|------|----------------|----|------|------|----------------|----|------|------|
|                      | X <sup>2</sup> | df | p    | ε    | X <sup>2</sup> | df | p    | ε    | X <sup>2</sup> | df | p    | ε    |
| <b>Most</b><br>Time  | 29.923         | 9  | .000 | .630 | 30.653         | 9  | .000 | .665 | 19.251         | 9  | .024 | .672 |
| <b>Least</b><br>Time | 17.153         | 9  | .047 | .735 | 11.929         | 9  | .219 | .772 | 13.192         | 9  | .156 | .729 |

*ε indicates Greenhouse Geiser value. Most refers to most locomotion, least refers to least locomotion*

**Supplementary table S13: Simple main effects to investigate the interaction between the amount and timing of locomotion and the effect on the haemodynamic response**

| Factor: Time            | HbT              |        |      | HbO              |        |      | HbR              |        |      |
|-------------------------|------------------|--------|------|------------------|--------|------|------------------|--------|------|
|                         | df               | F      | p    | df               | F      | p    | df               | F      | p    |
| <b>Most Locomotion</b>  | 2.520,<br>50.409 | 12.998 | .000 | 2.660,<br>53.192 | 12.788 | .000 | 2.689,<br>53.781 | 11.504 | .000 |
| <b>Least Locomotion</b> | 2.940,<br>58.791 | 8.933  | .000 | 4, 80            | 9.939  | .000 | 4, 80            | 6.829  | .000 |

\*One-way ANOVAs were used to assess simple main effects



**Supplementary table S14: Notable comparisons between 5s time windows for HbT, HbO and HbR peaks during whisker stimulation during most or least locomotion conditions**

| <b>Haemodynamic Measure</b> | <b>Time window for ranking locomotion and time window compared to</b> | <b>P value</b> |
|-----------------------------|-----------------------------------------------------------------------|----------------|
| <b>Most Locomotion</b>      |                                                                       |                |
| HbT                         | -5-0 > 15-20                                                          | .013           |
|                             | 0-5 > 5-10                                                            | .006           |
|                             | 0-5 > 10-15                                                           | .003           |
|                             | 0-5 > 15-20                                                           | .000           |
| HbO                         | -5-0 > 10-15                                                          | .048           |
|                             | -5-0 > 15-20                                                          | .008           |
|                             | 0-5 > 5-10                                                            | .008           |
|                             | 0-5 > 10-15                                                           | .003           |
|                             | 0-5 > 15-20                                                           | .000           |
| HbR                         | -5-0 < 5-10                                                           | .017           |
|                             | -5-0 < 10-15                                                          | .012           |
|                             | -5-0 < 15-20                                                          | .005           |
|                             | 0-5 < 5-10                                                            | .013           |
|                             | 0-5 < 10-15                                                           | .004           |
|                             | 0-5 < 15-20                                                           | .001           |
| <b>Least Locomotion</b>     |                                                                       |                |
| HbT                         | -5-0 > 0-5                                                            | .000           |
|                             | 0-5 < 5-10                                                            | .013           |
|                             | 0-5 < 10-15                                                           | .009           |
|                             | 0-5 < 15-20                                                           | .005           |
| HbO                         | -5-0 > 0-5                                                            | .000           |
|                             | 0-5 < 5-10                                                            | .006           |
|                             | 0-5 < 10-15                                                           | .001           |
|                             | 0-5 < 15-20                                                           | .002           |
| HbR                         | -5-0 < 0-5                                                            | .008           |
|                             | 0-5 > 5-10                                                            | .018           |
|                             | 0-5 > 10-15                                                           | .007           |
|                             | 0-5 > 15-20                                                           | .015           |

*> Indicates greater than and < indicates less than*

**Supplementary table S15: Pairwise comparisons with a Bonferroni correction comparing mean peaks for trials in which most and least locomotion occurred during the different time windows**

| Time window | Measure | Most Locomotion |        | Least Locomotion |        | df    | F      | p     |
|-------------|---------|-----------------|--------|------------------|--------|-------|--------|-------|
|             |         | M               | SEM    | M                | SEM    |       |        |       |
| -5-0        | HbT     | 1.049           | ± .008 | 1.035            | ± .003 | 1, 20 | 3.466  | .077  |
|             | HbO     | 1.078           | ± .011 | 1.061            | ± .006 | 1, 20 | 2.401  | .137  |
|             | HbR     | 0.930           | ± .008 | 0.944            | ± .006 | 1, 20 | 2.149  | .158  |
| 0-5         | HbT     | 1.054           | ± .007 | 1.020            | ± .002 | 1, 20 | 19.676 | .000* |
|             | HbO     | 1.083           | ± .009 | 1.033            | ± .004 | 1, 20 | 24.825 | .000* |
|             | HbR     | 0.934           | ± .006 | 0.969            | ± .004 | 1, 20 | 38.753 | .000* |
| 5-10        | HbT     | 1.041           | ± .007 | 1.031            | ± .003 | 1, 20 | 3.144  | .091  |
|             | HbO     | 1.063           | ± .009 | 1.052            | ± .005 | 1, 20 | 1.702  | .207  |
|             | HbR     | 0.948           | ± .005 | 0.952            | ± .005 | 1, 20 | .486   | .494  |
| 10-15       | HbT     | 1.037           | ± .005 | 1.034            | ± .004 | 1, 20 | .756   | .395  |
|             | HbO     | 1.058           | ± .007 | 1.057            | ± .006 | 1, 20 | .057   | .814  |
|             | HbR     | 0.951           | ± .005 | 0.948            | ± .006 | 1, 20 | .316   | .580  |
| 15-20       | HbT     | 1.032           | ± .004 | 1.031            | ± .003 | 1, 20 | .058   | .812  |
|             | HbO     | 1.052           | ± .006 | 1.052            | ± .005 | 1, 20 | .000   | .995  |
|             | HbR     | 0.954           | ± .005 | 0.951            | ± .005 | 1, 20 | .219   | .645  |

*\*Indicates a significant difference between the mean peak of the haemodynamic measure when comparing most and least locomotion, with Bonferroni adjustment applied. M indicates mean and SEM indicates standard error of the mean*

Two-way Repeated measures ANOVAs for linear subtraction of spontaneous trials from 2s whisker stimulation trials

**Supplementary table S16: Shapiro Wilk test of normality for each time window, amount of locomotion and haemodynamic measures**

| Time window | Most Locomotion |       |     |       |     |      | Least Locomotion |       |     |       |     |       |
|-------------|-----------------|-------|-----|-------|-----|------|------------------|-------|-----|-------|-----|-------|
|             | HbT             |       | HbO |       | HbR |      | HbT              |       | HbO |       | HbR |       |
|             | df              | p     | df  | p     | df  | p    | df               | p     | df  | p     | df  | p     |
| -5-0        | 21              | .000* | 21  | .005* | 21  | .150 | 21               | .742  | 21  | .999  | 21  | .923  |
| 0-5         | 21              | .000* | 21  | .014* | 21  | .618 | 21               | .665  | 21  | .625  | 21  | .036* |
| 5-10        | 21              | .007* | 21  | .374  | 21  | .663 | 21               | .003* | 21  | .030* | 21  | .132  |
| 10-15       | 21              | .013* | 21  | .721  | 21  | .832 | 21               | .002* | 21  | .336  | 21  | .402  |
| 15-20       | 21              | .024* | 21  | .945  | 21  | .410 | 21               | .006* | 21  | .021* | 21  | .054  |

Performed on studentised residuals. Time window is the time window in which locomotion was calculated for ranking purposes. \*Indicates normality is violated

**Supplementary table S17: Sphericity Results for the two-way repeated measures ANOVAs (Mauchly's test)**

| Factor            | X <sup>2</sup> | HbT |      |      | HbO    |   |      | HbR  |        |   |      |      |
|-------------------|----------------|-----|------|------|--------|---|------|------|--------|---|------|------|
|                   |                | df  | p    | ε    | df     | p | ε    | df   | p      | ε |      |      |
| Time              | 15.667         | 9   | .075 | .707 | 14.081 | 9 | .121 | .733 | 8.073  | 9 | .529 | .798 |
| Time * Locomotion | 24.965         | 9   | .003 | .650 | 17.410 | 9 | .043 | .720 | 14.000 | 9 | .124 | .793 |

ε indicates Greenhouse Geiser value. X<sup>2</sup> Chi-squared value. Values <.05 sphericity violated

**Supplementary table S18: Two-Way Repeated ANOVA outputs for HbT, HbO and HbR investigating the interaction between the amount of locomotion (factors: most & least) and the time at which locomotion occurred (factors: -5-0s, 0-5s, 5-10s, 10-15s, 15-20s)**

| Factor            | HbT              |       |       | HbO              |       |      | HbR  |       |      |
|-------------------|------------------|-------|-------|------------------|-------|------|------|-------|------|
|                   | df               | F     | p     | df               | F     | p    | df   | F     | p    |
| Time              | 4,80             | 1.241 | .300  | 4,80             | 0.622 | .648 | 4,80 | 2.563 | .045 |
| Locomotion        | 1,20             | 0.426 | .522  | 1,20             | 0.417 | .526 | 1,20 | 2.030 | .170 |
| Time * Locomotion | 2.599,5<br>1.984 | 5.290 | .004* | 2.878,<br>57.562 | 5.248 | .003 | 4,80 | 3.123 | .019 |

**Supplementary table S19: Sphericity Results (Mauchly's test) for simple main effects (One-way ANOVAs) investigating the effects of timing of locomotion on sensory-evoked hemodynamic responses for the most and least locomotion**

|              | HbT      |    |      |            | HbO      |    |      |            | HbR      |    |      |            |
|--------------|----------|----|------|------------|----------|----|------|------------|----------|----|------|------------|
|              | $\chi^2$ | df | p    | $\epsilon$ | $\chi^2$ | df | p    | $\epsilon$ | $\chi^2$ | df | p    | $\epsilon$ |
| <b>Most</b>  |          |    |      |            |          |    |      |            |          |    |      |            |
| Time         | 23.435   | 9  | .005 | .679       | 19.677   | 9  | .020 | .708       | 15.675   | 9  | .075 | .687       |
| <b>Least</b> |          |    |      |            |          |    |      |            |          |    |      |            |
| Time         | 24.856   | 9  | .003 | .593       | 16.553   | 9  | .057 | .682       | 6.793    | 9  | .660 | .857       |

*$\epsilon$  indicates Greenhouse Geiser value. Most refers to most locomotion, least refers to least locomotion*

**Supplementary table S20: Simple main effects to investigate the interaction between the amount and timing of locomotion and the effect on the haemodynamic response**

| Factor: Time      | HbT    |       |      | HbO    |       |      | HbR  |       |      |
|-------------------|--------|-------|------|--------|-------|------|------|-------|------|
|                   | df     | F     | p    | df     | F     | p    | df   | F     | p    |
| <b>Most</b>       | 2.717, | 3.915 | .016 | 2.832, | 2.891 | .046 | 4,80 | 0.601 | .663 |
| <b>Locomotion</b> | 54.340 |       |      | 56.646 |       |      |      |       |      |
| <b>Least</b>      | 2.373, | 3.754 | .024 | 4,80   | 4.179 | .004 | 4,80 | 4.925 | .001 |
| <b>Locomotion</b> | 47.461 |       |      |        |       |      |      |       |      |

\*One-way ANOVAs were used to assess simple main effects

**Supplementary table S21: Notable comparisons between 5s time windows for HbT, HbO and HbR peaks during whisker stimulation during most or least locomotion conditions**

| Haemodynamic Measure    | Time window for ranking locomotion and time window compared to | P value |
|-------------------------|----------------------------------------------------------------|---------|
| <b>Most Locomotion</b>  |                                                                |         |
| HbT                     | 0-5 > 15-20                                                    | .049    |
| <b>Least Locomotion</b> |                                                                |         |
| HbT                     | 0-5 < 10-15                                                    | .015    |
| HbO                     | 0-5 < 10-15                                                    | .006    |
| HbR                     | 0-5 > 10-15                                                    | .034    |

> Indicates greater than and < indicates less than

**Supplementary table S22: Pairwise comparisons with a Bonferroni correction comparing mean peaks for trials in which most and least locomotion occurred during the different time windows**

| Time window | Measure | Most Locomotion |        | Least Locomotion |        | df    | F      | p     |
|-------------|---------|-----------------|--------|------------------|--------|-------|--------|-------|
|             |         | M               | SEM    | M                | SEM    |       |        |       |
| -5-0        | HbT     | 1.034           | ± .007 | 1.040            | ± .004 | 1, 20 | 0.777  | .388  |
|             | HbO     | 1.051           | ± .008 | 1.069            | ± .007 | 1, 20 | 3.198  | .089  |
|             | HbR     | 0.948           | ± .007 | 0.929            | ± .007 | 1, 20 | 3.558  | .074  |
| 0-5         | HbT     | 1.046           | ± .007 | 1.026            | ± .003 | 1, 20 | 10.049 | .005* |
|             | HbO     | 1.070           | ± .009 | 1.046            | ± .004 | 1, 20 | 6.790  | .017* |
|             | HbR     | 0.943           | ± .006 | 0.953            | ± .005 | 1, 20 | 1.757  | .200  |
| 5-10        | HbT     | 1.037           | ± .006 | 1.035            | ± .005 | 1, 20 | 0.225  | .640  |
|             | HbO     | 1.056           | ± .008 | 1.058            | ± .007 | 1, 20 | 0.090  | .767  |
|             | HbR     | 0.951           | ± .006 | 0.948            | ± .005 | 1, 20 | 0.171  | .683  |
| 10-15       | HbT     | 1.034           | ± .004 | 1.038            | ± .004 | 1, 20 | 1.217  | .283  |
|             | HbO     | 1.053           | ± .006 | 1.065            | ± .006 | 1, 20 | 3.969  | .060  |
|             | HbR     | 0.950           | ± .006 | 0.934            | ± .006 | 1, 20 | 6.060  | .023* |
| 15-20       | HbT     | 1.031           | ± .003 | 1.033            | ± .003 | 1, 20 | 0.735  | .402  |
|             | HbO     | 1.051           | ± .005 | 1.058            | ± .005 | 1, 20 | 1.324  | .263  |
|             | HbR     | 0.947           | ± .006 | 0.939            | ± .005 | 1, 20 | 1.334  | .262  |

*\*Indicates a significant difference between the mean peak of the haemodynamic measure when comparing most and least locomotion, with Bonferroni adjustment applied. M indicates mean and SEM indicates standard error of the mean*
